# Supplementary material
Source: PubMed Central journal article supplement (PMC7724912)
Supplement: advancesADV2020003170-suppl1.pdf [file advancesADV2020003170-suppl1.pdf]

## The ASH Research Collaborative COVID-19 Registry for Hematology

This form is to be completed by a health care professional caring for a patient with documented coronavirus (COVID-19) and a hematologic condition or complication in one or more of three categories: 1) underlying hematologic malignancy preceding a COVID-19 diagnosis; 2) underlying non-malignant hematologic condition preceding a COVID-19 diagnosis; or 3) hematologic complication following a COVID-19 diagnosis. If you are a patient or family member of a patient who would like to contribute data, please speak with your healthcare provider and ask them to submit data on your behalf. Please report only confirmed COVID-19 cases. A login is required to complete cases. This allows you to save a draft version of the submission. **Submissions should only be finalized after the reported case of COVID-19 has run its course.**

### Data flow:

Reporter Information → select category or categories (malignant hematology, non-malignant hematology, new post-COVID-19 hematologic complication) → patient information → COVID-19 information → non-malignant hematologic condition information AND/OR hematologic malignancy information AND/OR new post-COVID-19 hematologic complication information

*Fields marked with a red asterisk (\*) are required.*

| Reporter Information                                                                                                                                                                                                                    |  |                                                                        |  |                                                                     |                                |                                              |  |
|-----------------------------------------------------------------------------------------------------------------------------------------------------------------------------------------------------------------------------------------|--|------------------------------------------------------------------------|--|---------------------------------------------------------------------|--------------------------------|----------------------------------------------|--|
| <b>Name of reporter:*</b>                                                                                                                                                                                                               |  |                                                                        |  |                                                                     |                                |                                              |  |
| <b>Email address of reporter:*</b>                                                                                                                                                                                                      |  |                                                                        |  |                                                                     |                                |                                              |  |
| <b>Name of physician providing care for the patient's hematologic condition:*</b>                                                                                                                                                       |  |                                                                        |  |                                                                     |                                |                                              |  |
| <b>Name of center/practice providing care for the patient's hematologic condition:*</b>                                                                                                                                                 |  |                                                                        |  |                                                                     |                                |                                              |  |
| <b>Country and state (if USA) where the reporter is located:*</b>                                                                                                                                                                       |  |                                                                        |  |                                                                     |                                |                                              |  |
| <b>Your role:*</b>                                                                                                                                                                                                                      |  |                                                                        |  |                                                                     |                                |                                              |  |
| <input type="radio"/> I am the primary treating physician for the patient's hematologic condition or complication                                                                                                                       |  |                                                                        |  |                                                                     |                                |                                              |  |
| <input type="radio"/> I am reporting on behalf of the primary treating physician for the patient's hematologic condition or complication                                                                                                |  |                                                                        |  |                                                                     |                                |                                              |  |
| <b>Has this case been submitted to another COVID-19 registry?</b>                                                                                                                                                                       |  |                                                                        |  |                                                                     |                                |                                              |  |
| <input type="checkbox"/> SECURE-SCD Registry                                                                                                                                                                                            |  | <input type="checkbox"/> COVID-19 and Cancer Consortium (CCC19)        |  |                                                                     | <input type="checkbox"/> Other |                                              |  |
| <input type="checkbox"/> ASCO Registry                                                                                                                                                                                                  |  | <input type="checkbox"/> NCI COVID-19 in Cancer Patients, NCCAPS Study |  |                                                                     |                                |                                              |  |
| Category Selection                                                                                                                                                                                                                      |  |                                                                        |  |                                                                     |                                |                                              |  |
| <b>Please indicate the patient's hematologic condition and/or complication:</b>                                                                                                                                                         |  |                                                                        |  |                                                                     |                                |                                              |  |
| <input type="checkbox"/> Malignant hematologic condition                                                                                                                                                                                |  |                                                                        |  | <input type="checkbox"/> New post-COVID-19 hematologic complication |                                |                                              |  |
| <input type="checkbox"/> Non-malignant hematologic condition                                                                                                                                                                            |  |                                                                        |  |                                                                     |                                |                                              |  |
| Patient Information                                                                                                                                                                                                                     |  |                                                                        |  |                                                                     |                                |                                              |  |
| <b>Country of residence at time of COVID-19 diagnosis:*</b> List of countries                                                                                                                                                           |  |                                                                        |  |                                                                     |                                |                                              |  |
| <b>Age in years at time of COVID-19 diagnosis:*</b> <input type="radio"/> Unknown                                                                                                                                                       |  |                                                                        |  |                                                                     |                                |                                              |  |
| <input type="radio"/> Younger than 18 → <b>If Yes:</b> <input type="radio"/> <5 <input type="radio"/> 5-10 <input type="radio"/> 11-14 <input type="radio"/> 15-18                                                                      |  |                                                                        |  |                                                                     |                                |                                              |  |
| <input type="radio"/> 19-29 <input type="radio"/> 30-39 <input type="radio"/> 40-49 <input type="radio"/> 50-59 <input type="radio"/> 60-69 <input type="radio"/> 70-79 <input type="radio"/> 80-89 <input type="radio"/> Older than 90 |  |                                                                        |  |                                                                     |                                |                                              |  |
| <b>Sex:*</b> <input type="radio"/> Female <input type="radio"/> Male <input type="radio"/> Other                                                                                                                                        |  |                                                                        |  |                                                                     |                                |                                              |  |
| <b>Race/Ethnicity:</b>                                                                                                                                                                                                                  |  |                                                                        |  |                                                                     |                                |                                              |  |
| <input type="radio"/> White/Caucasian                                                                                                                                                                                                   |  | <input type="radio"/> Black/African/African American                   |  | <input type="radio"/> Asian                                         |                                | <input type="radio"/> Hispanic/Latino/Latina |  |
| <input type="radio"/> American Indian/Native Alaskan/Indigenous Persons                                                                                                                                                                 |  |                                                                        |  | <input type="radio"/> Native Hawaiian or Other Pacific Islander     |                                |                                              |  |
| <input type="radio"/> Other                                                                                                                                                                                                             |  | <input type="radio"/> Prefer not to report                             |  |                                                                     |                                |                                              |  |
| <b>Smoking status:</b> <input type="radio"/> Current smoker <input type="radio"/> Former smoker <input type="radio"/> Never smoker <input type="radio"/> Unknown                                                                        |  |                                                                        |  |                                                                     |                                |                                              |  |
| <b>Vaping status:</b> <input type="radio"/> Current vaper <input type="radio"/> Former vaper <input type="radio"/> Never vaper <input type="radio"/> Unknown                                                                            |  |                                                                        |  |                                                                     |                                |                                              |  |
| <b>Comorbidities:</b> <input type="checkbox"/> Non-hematologic cancer → <b>If Yes:</b> <input type="radio"/> Lung cancer <input type="radio"/> Pulmonary metastases                                                                     |  |                                                                        |  |                                                                     |                                |                                              |  |

|                                                                                                                                                                                                             |                                                      |                                                          |
|-------------------------------------------------------------------------------------------------------------------------------------------------------------------------------------------------------------|------------------------------------------------------|----------------------------------------------------------|
| <input type="checkbox"/> COPD/Emphysema                                                                                                                                                                     | <input type="checkbox"/> Other chronic lung disease  | <input type="checkbox"/> Coronary artery disease         |
| <input type="checkbox"/> Congestive heart failure                                                                                                                                                           | <input type="checkbox"/> Hypertension                | <input type="checkbox"/> HIV                             |
| <input type="checkbox"/> Other chronic heart disease                                                                                                                                                        | <input type="checkbox"/> Chronic renal insufficiency | <input type="checkbox"/> Hepatic dysfunction             |
| <input type="checkbox"/> Other chronic immunodeficiency                                                                                                                                                     | <input type="checkbox"/> Hepatitis C virus           | <input type="checkbox"/> Venous thromboembolism          |
| <input type="checkbox"/> Ischemic stroke/TIA                                                                                                                                                                | <input type="checkbox"/> Diabetes                    | <input type="checkbox"/> Autoimmune disease              |
| <input type="checkbox"/> Primary or secondary hypogammaglobulinemia                                                                                                                                         |                                                      | <input type="checkbox"/> Unknown                         |
| <b>COVID-19 Information</b>                                                                                                                                                                                 |                                                      |                                                          |
| <b>Diagnosis time period:</b> _____ Year of COVID-19 diagnosis*                                                                                                                                             |                                                      |                                                          |
| <b>COVID-19 diagnosis was confirmed with:*</b>                                                                                                                                                              |                                                      |                                                          |
| <input type="radio"/> Positive PCR test <input type="radio"/> Presumptive based on history / CT <input type="radio"/> Presumptive based on history / chest X-ray                                            |                                                      |                                                          |
| <b>Severity of COVID-19:*</b> <i>(select highest acuity experienced)</i>                                                                                                                                    |                                                      |                                                          |
| <input type="radio"/> Mild (no hospitalization required) <input type="radio"/> Moderate (hospitalization required) <input type="radio"/> Severe (ICU admission required)                                    |                                                      |                                                          |
| →If <b>Moderate, Respiratory Support:</b>                                                                                                                                                                   |                                                      |                                                          |
| <input type="radio"/> No supplemental oxygen <input type="radio"/> 1–5 l/min <input type="radio"/> High flow oxygen (> 5 l/min)                                                                             |                                                      |                                                          |
| →If <b>Severe, Therapy Administered:</b>                                                                                                                                                                    |                                                      |                                                          |
| <input type="checkbox"/> Non-invasive mechanical ventilation (e.g. BiPAP, CPAP)                                                                                                                             |                                                      | <input type="checkbox"/> Invasive mechanical ventilation |
| <input type="checkbox"/> Renal replacement therapy (intermittent or continuous)                                                                                                                             |                                                      | <input type="checkbox"/> Vasopressors and/or inotropes   |
| <input type="checkbox"/> ECMO                                                                                                                                                                               |                                                      |                                                          |
| <b>COVID-19 symptoms:*</b>                                                                                                                                                                                  |                                                      |                                                          |
| <input type="checkbox"/> Fever                                                                                                                                                                              | <input type="checkbox"/> Fatigue                     | <input type="checkbox"/> Headache                        |
| <input type="checkbox"/> Diaphoresis                                                                                                                                                                        | <input type="checkbox"/> Myalgias                    | <input type="checkbox"/> Confusion                       |
| <input type="checkbox"/> Weight loss                                                                                                                                                                        | <input type="checkbox"/> Abdominal pain              | <input type="checkbox"/> Anosmia                         |
| <input type="checkbox"/> Cough                                                                                                                                                                              | <input type="checkbox"/> Diarrhea                    | <input type="checkbox"/> Shortness of breath             |
| <input type="checkbox"/> Rhinorrhea                                                                                                                                                                         | <input type="checkbox"/> Nausea and/or vomiting      | <input type="checkbox"/> None (patient was asymptomatic) |
| <b>Did the patient receive any treatment specifically to treat COVID-19?*</b> <input type="radio"/> Yes <input type="radio"/> No <input type="radio"/> Unknown                                              |                                                      |                                                          |
| → If Yes, which, if any of the following COVID-19-directed treatments did the patient receive?                                                                                                              |                                                      |                                                          |
| <input type="checkbox"/> ribavirin                                                                                                                                                                          | <input type="checkbox"/> remdesivir                  | <input type="checkbox"/> mesenchymal stem cells          |
| <input type="checkbox"/> lopinavir + ritonavir (kaletra)                                                                                                                                                    | <input type="checkbox"/> losartan                    | <input type="checkbox"/> convalescent plasma             |
| <input type="checkbox"/> favipiravir                                                                                                                                                                        | <input type="checkbox"/> IVIG                        | <input type="checkbox"/> tocilizumab                     |
| <input type="checkbox"/> chloroquine                                                                                                                                                                        | <input type="checkbox"/> siltuximab                  | <input type="checkbox"/> azithromycin                    |
| <input type="checkbox"/> hydroxychloroquine                                                                                                                                                                 | <input type="checkbox"/> Other                       | <input type="checkbox"/> dexamethasone                   |
| <b>Have the patient's symptoms resolved at the time of this report?*</b>                                                                                                                                    |                                                      |                                                          |
| <input type="radio"/> Yes <input type="radio"/> No <input type="radio"/> Unknown <input type="radio"/> Not applicable                                                                                       |                                                      |                                                          |
| <b>What was the total duration of symptoms, from time of first onset to resolution or death?</b>                                                                                                            |                                                      |                                                          |
| <input type="radio"/> <= 2 days <input type="radio"/> 3 - 5 days <input type="radio"/> 6 - 10 days <input type="radio"/> 11 - 15 days <input type="radio"/> 16 - 20 days <input type="radio"/> 21 - 25 days |                                                      |                                                          |
| <input type="radio"/> 26 - 30 days <input type="radio"/> > 30 days <input type="radio"/> Patient never had symptoms (positive test only) <input type="radio"/> Unknown                                      |                                                      |                                                          |
| <b>At the time of COVID-19 diagnosis, was the patient neutropenic?</b> <input type="radio"/> Yes <input type="radio"/> No <input type="radio"/> Unknown                                                     |                                                      |                                                          |
| →If Yes, what was the neutrophil count?                                                                                                                                                                     |                                                      |                                                          |
| <input type="radio"/> > 1.0 cells x 10 <sup>9</sup> /L <input type="radio"/> 0.5 to 1.0 cells x 10 <sup>9</sup> /L <input type="radio"/> < 0.5 cells x 10 <sup>9</sup> /L <input type="radio"/> Unknown     |                                                      |                                                          |
| <b>At the time of COVID-19 diagnosis, was the patient lymphopenic?</b> <input type="radio"/> Yes <input type="radio"/> No <input type="radio"/> Unknown                                                     |                                                      |                                                          |
| →If Yes, what was the lymphocyte count?                                                                                                                                                                     |                                                      |                                                          |
| <input type="radio"/> > 1.0 cells x 10 <sup>9</sup> /L <input type="radio"/> 1.0 to 0.5 cells x 10 <sup>9</sup> /L <input type="radio"/> < 0.5 cells x 10 <sup>9</sup> /L <input type="radio"/> Unknown     |                                                      |                                                          |
| <b>Was there a decision to forgo ICU admission in favor of a palliative approach?</b> <input type="radio"/> Yes <input type="radio"/> No <input type="radio"/> Unknown                                      |                                                      |                                                          |

## Non-Malignant Hematologic Condition Information

**What is your patient's non-malignant hematologic condition? \***

**Hemophilia A → If Yes, what treatment(s) did your patient receive in the last 12 months and which was the most recent treatment prior to COVID-19 diagnosis?**

- Patient DID NOT have treatment in the past year  
 Patient DID have treatment in the past year

| Treatment                                                                                                                                                          | Last 12 Months                                                                   | Last Prior to COVID-19 Diagnosis                                                 |
|--------------------------------------------------------------------------------------------------------------------------------------------------------------------|----------------------------------------------------------------------------------|----------------------------------------------------------------------------------|
| Prophylaxis                                                                                                                                                        |                                                                                  |                                                                                  |
| <ul style="list-style-type: none"> <li>• Standard half-life (SHL) FVIII product</li> <li>• Extended half-life (EHL) FVIII product</li> <li>• Emicizumab</li> </ul> | <input type="checkbox"/><br><input type="checkbox"/><br><input type="checkbox"/> | <input type="checkbox"/><br><input type="checkbox"/><br><input type="checkbox"/> |
| On-demand                                                                                                                                                          |                                                                                  |                                                                                  |
| <ul style="list-style-type: none"> <li>• Standard half-life (SHL) FVIII product</li> <li>• Extended half-life (EHL) FVIII product</li> </ul>                       | <input type="checkbox"/><br><input type="checkbox"/>                             | <input type="checkbox"/><br><input type="checkbox"/>                             |
| Gene therapy                                                                                                                                                       | <input type="checkbox"/>                                                         | <input type="checkbox"/>                                                         |
| Clinical trial therapy                                                                                                                                             | <input type="checkbox"/>                                                         | <input type="checkbox"/>                                                         |

**Hemophilia B → If Yes, what treatments did your patient receive in the last 12 months and which was the most recent treatment prior to COVID-19 diagnosis?**

- Patient DID NOT have treatment in the past year  
 Patient DID have treatment in the past year

| Treatment                                                                                                                                                          | Last 12 Months                                                                   | Last Prior to COVID-19 Diagnosis                                                 |
|--------------------------------------------------------------------------------------------------------------------------------------------------------------------|----------------------------------------------------------------------------------|----------------------------------------------------------------------------------|
| Prophylaxis                                                                                                                                                        |                                                                                  |                                                                                  |
| <ul style="list-style-type: none"> <li>• Standard half-life (SHL) FVIII product</li> <li>• Extended half-life (EHL) FVIII product</li> <li>• Emicizumab</li> </ul> | <input type="checkbox"/><br><input type="checkbox"/><br><input type="checkbox"/> | <input type="checkbox"/><br><input type="checkbox"/><br><input type="checkbox"/> |
| On-demand                                                                                                                                                          |                                                                                  |                                                                                  |
| <ul style="list-style-type: none"> <li>• Standard half-life (SHL) FVIII product</li> <li>• Extended half-life (EHL) FVIII product</li> </ul>                       | <input type="checkbox"/><br><input type="checkbox"/>                             | <input type="checkbox"/><br><input type="checkbox"/>                             |
| Gene therapy                                                                                                                                                       | <input type="checkbox"/>                                                         | <input type="checkbox"/>                                                         |
| Clinical trial therapy                                                                                                                                             | <input type="checkbox"/>                                                         | <input type="checkbox"/>                                                         |

**Von Willebrand Disease (VWD) → If Yes, What Type of VWD?**

- Type 1  
 Type 2 → If Yes, what Type 2 VWD?     2A     2B     M     N  
 Type 3

**→ If Yes, what treatments did your patient receive in the last 12 months and which was the most recent treatment prior to COVID-19 diagnosis?**

- Patient DID NOT have treatment in the past year  
 Patient DID have treatment in the past year

| Treatment                                                                                                                                                                                                 | Last 12 Months                                                                                                                                                       | Last Prior to COVID-19 Diagnosis                                                                                                                                     |
|-----------------------------------------------------------------------------------------------------------------------------------------------------------------------------------------------------------|----------------------------------------------------------------------------------------------------------------------------------------------------------------------|----------------------------------------------------------------------------------------------------------------------------------------------------------------------|
| Prophylaxis <ul style="list-style-type: none"> <li>• Humate-P</li> <li>• Wilate</li> <li>• Vonvendi</li> <li>• DDAVP</li> <li>• Tranexamic acid or epsilon amino caproic acid</li> <li>• Other</li> </ul> | <input type="checkbox"/><br><input type="checkbox"/><br><input type="checkbox"/><br><input type="checkbox"/><br><input type="checkbox"/><br><input type="checkbox"/> | <input type="checkbox"/><br><input type="checkbox"/><br><input type="checkbox"/><br><input type="checkbox"/><br><input type="checkbox"/><br><input type="checkbox"/> |
| On-demand <ul style="list-style-type: none"> <li>• Humate-P</li> <li>• Wilate</li> <li>• Vonvendi</li> <li>• DDAVP</li> <li>• Tranexamic acid or epsilon amino caproic acid</li> <li>• Other</li> </ul>   | <input type="checkbox"/><br><input type="checkbox"/><br><input type="checkbox"/><br><input type="checkbox"/><br><input type="checkbox"/><br><input type="checkbox"/> | <input type="checkbox"/><br><input type="checkbox"/><br><input type="checkbox"/><br><input type="checkbox"/><br><input type="checkbox"/><br><input type="checkbox"/> |
| Clinical trial therapy                                                                                                                                                                                    | <input type="checkbox"/>                                                                                                                                             | <input type="checkbox"/>                                                                                                                                             |

→ Were changes made to the patient's hemophilia or VWD treatment plan *BEFORE and/or AFTER* COVID-19 diagnosis, as a result of the COVID-19 pandemic?

|                                                  | Before COVID-19 Diagnosis | After COVID-19 Diagnosis |
|--------------------------------------------------|---------------------------|--------------------------|
| No change made                                   | 0                         | 0                        |
| Initiation of prophylaxis                        | 0                         | 0                        |
| Intensified prophylaxis                          | 0                         | 0                        |
| Change in type of replacement product            | 0                         | 0                        |
| Other changes made to treatment dose or schedule | 0                         | 0                        |

→ Did the patient develop any bleeding complications?

Yes       No       Unknown

Sickle Cell Disease (please report this case to <https://covidsicklecell.org>)

→ If Yes, what genotype of sickle cell disease?

Sickle cell disease SS/S-beta (0) thalassemia       Sickle cell disease SC  
 Sickle cell disease S-beta (+) thalassemia       Sickle cell disease – other

Aplastic Anemia

→ If Yes, what treatments did your patient receive in the last 12 months and which was the most recent treatment prior to COVID-19 diagnosis?

Patient DID NOT have treatment in the past year  
 Patient DID have treatment in the past year

| Treatment              | Last 12 Months           | Last Prior to COVID-19 Diagnosis |
|------------------------|--------------------------|----------------------------------|
| No treatment           | <input type="checkbox"/> | <input type="checkbox"/>         |
| Corticosteroids        | <input type="checkbox"/> | <input type="checkbox"/>         |
| IVIg                   | <input type="checkbox"/> | <input type="checkbox"/>         |
| Tacrolimus             | <input type="checkbox"/> | <input type="checkbox"/>         |
| Cyclosporine           | <input type="checkbox"/> | <input type="checkbox"/>         |
| Mycophenolate mofetil  | <input type="checkbox"/> | <input type="checkbox"/>         |
| Antithymocyte globulin | <input type="checkbox"/> | <input type="checkbox"/>         |
| Cyclophosphamide       | <input type="checkbox"/> | <input type="checkbox"/>         |
| Eltrombopag            | <input type="checkbox"/> | <input type="checkbox"/>         |
| Alemtuzumab            | <input type="checkbox"/> | <input type="checkbox"/>         |
| Iron chelation         | <input type="checkbox"/> | <input type="checkbox"/>         |
| G-CSF                  | <input type="checkbox"/> | <input type="checkbox"/>         |
| Bone marrow transplant | <input type="checkbox"/> | <input type="checkbox"/>         |
| Other                  | <input type="checkbox"/> | <input type="checkbox"/>         |
| Unknown                | <input type="checkbox"/> | <input type="checkbox"/>         |

→ Were changes made to the patient's aplastic anemia treatment plan *BEFORE and/or AFTER* COVID-19 diagnosis, as a result of the COVID-19 pandemic?

|                                                  | Before COVID-19 Diagnosis | After COVID-19 Diagnosis |
|--------------------------------------------------|---------------------------|--------------------------|
| No change made                                   | <input type="radio"/>     | <input type="radio"/>    |
| Discontinuation of treatment, no plan to resume  | <input type="radio"/>     | <input type="radio"/>    |
| Discontinuation of treatment, plan to change     | <input type="radio"/>     | <input type="radio"/>    |
| Change in type of treatment                      | <input type="radio"/>     | <input type="radio"/>    |
| Other changes made to treatment dose or schedule | <input type="radio"/>     | <input type="radio"/>    |

**Thalassemia**

→ If Yes, what type of thalassemia?

$\beta$ -Thalassemia major        $\beta$ -Thalassemia intermedia       Hemoglobin H disease       Other

→ If Yes, what treatments did your patient receive in the last 12 months and which was the most recent treatment prior to COVID-19 diagnosis?

Patient DID NOT have treatment in the past year

Patient DID have treatment in the past year

| Treatment                  | Last 12 Months           | Last Prior to COVID-19 Diagnosis |
|----------------------------|--------------------------|----------------------------------|
| No treatment               | <input type="checkbox"/> | <input type="checkbox"/>         |
| Routine RBC transfusions   | <input type="checkbox"/> | <input type="checkbox"/>         |
| RBC transfusions on demand | <input type="checkbox"/> | <input type="checkbox"/>         |
| Luspatercept               | <input type="checkbox"/> | <input type="checkbox"/>         |
| Deferoxamine               | <input type="checkbox"/> | <input type="checkbox"/>         |
| Deferiprone                | <input type="checkbox"/> | <input type="checkbox"/>         |
| Deferasirox                | <input type="checkbox"/> | <input type="checkbox"/>         |
| Bone marrow transplant     | <input type="checkbox"/> | <input type="checkbox"/>         |
| Other                      | <input type="checkbox"/> | <input type="checkbox"/>         |

|         |                          |                          |
|---------|--------------------------|--------------------------|
| Unknown | <input type="checkbox"/> | <input type="checkbox"/> |
|---------|--------------------------|--------------------------|

→ Were changes made to the patient's thalassemia treatment plan *BEFORE and/or AFTER* COVID-19 diagnosis, as a result of the COVID-19 pandemic?

|                                                      | Before COVID-19 Diagnosis | After COVID-19 Diagnosis |
|------------------------------------------------------|---------------------------|--------------------------|
| No change made                                       | <input type="radio"/>     | <input type="radio"/>    |
| Treatment stopped, no plan to restart treatment      | <input type="radio"/>     | <input type="radio"/>    |
| Treatment stopped, plan to resume treatment          | <input type="radio"/>     | <input type="radio"/>    |
| Treatment stopped, plan to start different treatment | <input type="radio"/>     | <input type="radio"/>    |
| Other changes made to treatment dose or schedule     | <input type="radio"/>     | <input type="radio"/>    |

**Immune Thrombocytopenia**

→ If Yes, what treatments did your patient receive in the last 12 months and which was the most recent treatment prior to COVID-19 diagnosis?

Patient DID NOT have treatment in the past year

Patient DID have treatment in the past year

| Treatment       | Last 12 Months           | Last Prior to COVID-19 Diagnosis |
|-----------------|--------------------------|----------------------------------|
| Corticosteroids | <input type="checkbox"/> | <input type="checkbox"/>         |
| IVIg            | <input type="checkbox"/> | <input type="checkbox"/>         |
| Rituximab       | <input type="checkbox"/> | <input type="checkbox"/>         |
| Romiplostim     | <input type="checkbox"/> | <input type="checkbox"/>         |
| Fostamatinib    | <input type="checkbox"/> | <input type="checkbox"/>         |
| Avatrombopag    | <input type="checkbox"/> | <input type="checkbox"/>         |
| Splenectomy     | <input type="checkbox"/> | <input type="checkbox"/>         |
| Other           | <input type="checkbox"/> | <input type="checkbox"/>         |

→ Platelet count at time of COVID-19 diagnosis:

$< 30 \times 10^9/L$         $30 - 50 \times 10^9/L$         $50 - 100 \times 10^9/L$         $> 150 \times 10^9/L$

→ Were changes made to the patient's ITP treatment plan *BEFORE and/or AFTER* COVID-19 diagnosis, as a result of the COVID-19 pandemic?

|                                                      | Before COVID-19 Diagnosis | After COVID-19 Diagnosis |
|------------------------------------------------------|---------------------------|--------------------------|
| No change made                                       | <input type="radio"/>     | <input type="radio"/>    |
| Treatment stopped, no plan to restart treatment      | <input type="radio"/>     | <input type="radio"/>    |
| Treatment stopped, plan to resume treatment          | <input type="radio"/>     | <input type="radio"/>    |
| Treatment stopped, plan to start different treatment | <input type="radio"/>     | <input type="radio"/>    |
| Other changes made to treatment dose or schedule     | <input type="radio"/>     | <input type="radio"/>    |

**Venous Thromboembolism (VTE)**

→ If Yes, what anticoagulation did your patient receive in the last 12 months and which was the most recent treatment prior to COVID diagnosis?

Patient DID NOT have anticoagulation in past year

Patient DID have anticoagulation in the past year:

low molecular weight heparin → If Yes, indicate dose intensity:

Standard prophylactic dose

Weight-adjusted prophylactic dose

Intermediate dose                       Therapeutic dose

fondaparinux → **If Yes, indicate dose intensity:**

Low dose (2.5 mg once daily)

Intermediate dose (intermediate between low dose and therapeutic dose)

Therapeutic dose (5 mg for weight <50 kg, 7.5 mg for weight 50 to 100 kg, 10 mg for weight >100 kg)

apixaban → **If Yes, indicate dose:**

2.5 mg twice daily

5 mg twice daily

10 mg twice daily

rivaroxaban → **If Yes, indicate dose**

10 mg once daily

15 mg once daily

20 mg once daily

15 mg twice daily

edoxaban → **If Yes, indicate dose:**

30 mg once daily

60 mg once daily

dabigatran → **If Yes, indicate dose:**

75 mg twice daily

110 mg twice daily

150 mg twice daily

warfarin → **If Yes, indicate target therapeutic range:**

INR 1.5 to 2.5

INR 2 to 3

INR 2.5 to 3.5

Unknown

Other

→ **Timing of most recent VTE diagnosis, relative to the time of the COVID-19 diagnosis?**

Within past 3 months prior to COVID-19     3 months-1 year prior to COVID-19

> 1 year prior to COVID-19

Unknown

→ **Location of most recent VTE:**

Lower extremity DVT

Upper extremity DVT

Unusual site DVT (splanchnic, cerebral v.)

PE

→ **Most recent VTE diagnosis was:**

First VTE

Recurrent VTE

→ **Most recent VTE was:**

Unprovoked

Provoked by a persistent risk factor (e.g. cancer, APLA)

Provoked by a transient risk factor (e.g. surgery, trauma, admission to hospital, pregnancy/delivery)

→ **Were changes made to the patient's VTE treatment plan *BEFORE and/or AFTER* COVID-19 diagnosis, as a result of the COVID-19 pandemic?**

|                                                      | Before COVID-19<br>Diagnosis | After COVID-19<br>Diagnosis |
|------------------------------------------------------|------------------------------|-----------------------------|
| No change made                                       | <input type="radio"/>        | <input type="radio"/>       |
| Treatment stopped, no plan to restart treatment      | <input type="radio"/>        | <input type="radio"/>       |
| Treatment stopped, plan to resume treatment          | <input type="radio"/>        | <input type="radio"/>       |
| Treatment stopped, plan to start different treatment | <input type="radio"/>        | <input type="radio"/>       |
| Changes made to treatment dose or schedule           | <input type="radio"/>        | <input type="radio"/>       |

**Other chronic hematologic conditions:**

Autoimmune hemolytic anemia

Cold agglutinin disease

Hereditary hemorrhagic telangiectasia

Atypical hemolytic uremic syndrome

Paroxysmal nocturnal hemoglobinuria

Thrombotic thrombocytopenic purpura

Hemochromatosis

## Hematologic Malignancy Information

**What is your patient's hematologic malignancy?\***

- Acute Myeloid Leukemia (non-APL) -and/or-
- Acute Promyelocytic Leukemia -and/or-
- Acute Lymphoblastic Leukemia -and/or-
- Myelodysplastic Syndrome

→ If Yes, what treatments did your patient receive in the last 12 months and which was the most recent treatment prior to COVID-19 diagnosis?

Patient DID NOT have treatment in the past year

Patient DID have treatment in the past year

| Treatment                                       | Last 12 Months           | Last Prior to COVID-19 Diagnosis |
|-------------------------------------------------|--------------------------|----------------------------------|
| Intensive induction therapy for acute leukemia  | <input type="checkbox"/> | <input type="checkbox"/>         |
| Consolidation therapy for acute leukemia        | <input type="checkbox"/> | <input type="checkbox"/>         |
| Maintenance therapy for acute leukemia          | <input type="checkbox"/> | <input type="checkbox"/>         |
| ATRA                                            | <input type="checkbox"/> | <input type="checkbox"/>         |
| ATO                                             | <input type="checkbox"/> | <input type="checkbox"/>         |
| Hydroxyurea                                     | <input type="checkbox"/> | <input type="checkbox"/>         |
| Gemtuzumab                                      | <input type="checkbox"/> | <input type="checkbox"/>         |
| Low dose palliative chemotherapy                | <input type="checkbox"/> | <input type="checkbox"/>         |
| Steroids                                        | <input type="checkbox"/> | <input type="checkbox"/>         |
| Decitabine, azacitidine or similar              | <input type="checkbox"/> | <input type="checkbox"/>         |
| Venetoclax                                      | <input type="checkbox"/> | <input type="checkbox"/>         |
| Midostaurin, sorafenib or similar               | <input type="checkbox"/> | <input type="checkbox"/>         |
| Panobinostat                                    | <input type="checkbox"/> | <input type="checkbox"/>         |
| Imatinib, dasatinib or similar                  | <input type="checkbox"/> | <input type="checkbox"/>         |
| Inotuzumab                                      | <input type="checkbox"/> | <input type="checkbox"/>         |
| Blinatumomab or other bispecific T-cell engager | <input type="checkbox"/> | <input type="checkbox"/>         |
| Other                                           | <input type="checkbox"/> | <input type="checkbox"/>         |
| Unknown                                         | <input type="checkbox"/> | <input type="checkbox"/>         |

- Myelofibrosis (MF) -and/or-

- Myeloproliferative Neoplasm (excluding MF)

→ If Yes, what treatments did your patient receive in the last 12 months and which was the most recent treatment prior to COVID-19 diagnosis?

Patient DID NOT have treatment in the past year

Patient DID have treatment in the past year

| Treatment   | Last 12 Months           | Last Prior to COVID-19 Diagnosis |
|-------------|--------------------------|----------------------------------|
| Hydroxyurea | <input type="checkbox"/> | <input type="checkbox"/>         |
| Anegralide  | <input type="checkbox"/> | <input type="checkbox"/>         |
| Ruxolitinib | <input type="checkbox"/> | <input type="checkbox"/>         |
| Other       | <input type="checkbox"/> | <input type="checkbox"/>         |
| Unknown     | <input type="checkbox"/> | <input type="checkbox"/>         |

- Hodgkin lymphoma

→ If Yes, what treatments did your patient receive in the last 12 months and which was the most recent treatment prior to COVID-19 diagnosis?



Patient DID NOT have treatment in the past year

Patient DID have treatment in the past year

| Treatment                                         | Last 12 Months           | Last Prior to COVID-19 Diagnosis |
|---------------------------------------------------|--------------------------|----------------------------------|
| ABVD or similar (e.g. ABVE-PC)                    | <input type="checkbox"/> | <input type="checkbox"/>         |
| BEACOPP or similar                                | <input type="checkbox"/> | <input type="checkbox"/>         |
| OEPA/COPDAC or similar                            | <input type="checkbox"/> | <input type="checkbox"/>         |
| MOPP/COPP or similar                              | <input type="checkbox"/> | <input type="checkbox"/>         |
| Brentuximab vedotin                               | <input type="checkbox"/> | <input type="checkbox"/>         |
| Nivolumab or other check-point inhibitor          | <input type="checkbox"/> | <input type="checkbox"/>         |
| Platinum-based regimen (e.g. GDP, DHAP, ICE etc.) | <input type="checkbox"/> | <input type="checkbox"/>         |
| Steroids                                          | <input type="checkbox"/> | <input type="checkbox"/>         |
| Other                                             | <input type="checkbox"/> | <input type="checkbox"/>         |
| Unknown                                           | <input type="checkbox"/> | <input type="checkbox"/>         |

**Aggressive non-hodgkin lymphoma**

→ If Yes, what treatments did your patient receive in the last 12 months and which was the most recent treatment prior to COVID-19 diagnosis?

Patient DID NOT have treatment in the past year

Patient DID have treatment in the past year

| Treatment                                                                    | Last 12 Months           | Last Prior to COVID-19 Diagnosis |
|------------------------------------------------------------------------------|--------------------------|----------------------------------|
| Dose-dense anthracycline based chemo (e.g. Magrath, HyperCVAD, FAB/LMB etc.) | <input type="checkbox"/> | <input type="checkbox"/>         |
| Anthracylin-based chemo (e.g. CHOP, EPOCH, CHOEP etc.)                       | <input type="checkbox"/> | <input type="checkbox"/>         |
| Lower dose, palliative chemotherapy (e.g. CVP)                               | <input type="checkbox"/> | <input type="checkbox"/>         |
| Ibrutinib                                                                    | <input type="checkbox"/> | <input type="checkbox"/>         |
| Rituximab                                                                    | <input type="checkbox"/> | <input type="checkbox"/>         |
| Romidepsin                                                                   | <input type="checkbox"/> | <input type="checkbox"/>         |
| Brentuximab                                                                  | <input type="checkbox"/> | <input type="checkbox"/>         |
| Steroids                                                                     | <input type="checkbox"/> | <input type="checkbox"/>         |
| Platinum-based salvage regimen (e.g. GDP, DHAP, ICE etc.)                    | <input type="checkbox"/> | <input type="checkbox"/>         |
| Other                                                                        | <input type="checkbox"/> | <input type="checkbox"/>         |
| Unknown                                                                      | <input type="checkbox"/> | <input type="checkbox"/>         |

**Chronic lymphocytic leukemia/small lymphocytic lymphoma**

→ If Yes, what treatments did your patient receive in the last 12 months and which was the most recent treatment prior to COVID-19 diagnosis?

Patient DID NOT have treatment in the past year

Patient DID have treatment in the past year

| Treatment                 | Last 12 Months           | Last Prior to COVID-19 Diagnosis |
|---------------------------|--------------------------|----------------------------------|
| Acalabrutinib             | <input type="checkbox"/> | <input type="checkbox"/>         |
| Fludarabine based regimen | <input type="checkbox"/> | <input type="checkbox"/>         |
| Bendamustine              | <input type="checkbox"/> | <input type="checkbox"/>         |

|                                           |                          |                          |
|-------------------------------------------|--------------------------|--------------------------|
| Chlorambucil                              | <input type="checkbox"/> | <input type="checkbox"/> |
| Rituximab                                 | <input type="checkbox"/> | <input type="checkbox"/> |
| Obinutuzimab                              | <input type="checkbox"/> | <input type="checkbox"/> |
| Ofatumumab                                | <input type="checkbox"/> | <input type="checkbox"/> |
| Ibrutinib (or similar e.g. acalabrutinib) | <input type="checkbox"/> | <input type="checkbox"/> |
| Idelalisib (or similar)                   | <input type="checkbox"/> | <input type="checkbox"/> |
| Venetoclax                                | <input type="checkbox"/> | <input type="checkbox"/> |
| Alemtuzumab                               | <input type="checkbox"/> | <input type="checkbox"/> |
| Steroids                                  | <input type="checkbox"/> | <input type="checkbox"/> |
| Other                                     | <input type="checkbox"/> | <input type="checkbox"/> |
| Unknown                                   | <input type="checkbox"/> | <input type="checkbox"/> |

**Chronic Myeloid Leukemia**

→ If Yes, what treatments did your patient receive in the last 12 months and which was the most recent treatment prior to COVID-19 diagnosis?

Patient DID NOT have treatment in the past year

Patient DID have treatment in the past year

| Treatment | Last 12 Months           | Last Prior to COVID-19 Diagnosis |
|-----------|--------------------------|----------------------------------|
| Imatinib  | <input type="checkbox"/> | <input type="checkbox"/>         |
| Dasatinib | <input type="checkbox"/> | <input type="checkbox"/>         |
| Nilotinib | <input type="checkbox"/> | <input type="checkbox"/>         |
| Bosutinib | <input type="checkbox"/> | <input type="checkbox"/>         |
| Ponatinib | <input type="checkbox"/> | <input type="checkbox"/>         |
| Other     | <input type="checkbox"/> | <input type="checkbox"/>         |
| Unknown   | <input type="checkbox"/> | <input type="checkbox"/>         |

**Indolent Non-Hodgkin Lymphoma -and/or-**

**Mantle Cell Lymphoma**

→ If Yes, what treatments did your patient receive in the last 12 months and which was the most recent treatment prior to COVID-19 diagnosis?

Patient DID NOT have treatment in the past year

Patient DID have treatment in the past year

| Treatment                 | Last 12 Months           | Last Prior to COVID-19 Diagnosis |
|---------------------------|--------------------------|----------------------------------|
| Acalabrutinib             | <input type="checkbox"/> | <input type="checkbox"/>         |
| Bendamustine              | <input type="checkbox"/> | <input type="checkbox"/>         |
| Fludarabine-based regimen | <input type="checkbox"/> | <input type="checkbox"/>         |
| CHOP or Chop like regimen | <input type="checkbox"/> | <input type="checkbox"/>         |
| CVP                       | <input type="checkbox"/> | <input type="checkbox"/>         |
| Chlorambucil              | <input type="checkbox"/> | <input type="checkbox"/>         |
| Rituximab                 | <input type="checkbox"/> | <input type="checkbox"/>         |
| Romidepsin                | <input type="checkbox"/> | <input type="checkbox"/>         |
| Obinutuzumab              | <input type="checkbox"/> | <input type="checkbox"/>         |
| Ofatumumab                | <input type="checkbox"/> | <input type="checkbox"/>         |
| Lenalidomide              | <input type="checkbox"/> | <input type="checkbox"/>         |
| Ibrutinib                 | <input type="checkbox"/> | <input type="checkbox"/>         |

|                                                                           |                          |                          |
|---------------------------------------------------------------------------|--------------------------|--------------------------|
| Cladribine                                                                | <input type="checkbox"/> | <input type="checkbox"/> |
| Platinum-based salvage regimen (e.g. GDP, DHAP, ICE etc.) DHAP or similar | <input type="checkbox"/> | <input type="checkbox"/> |
| Idelalisib (or other PI3K inhibitor)                                      | <input type="checkbox"/> | <input type="checkbox"/> |
| Steroids                                                                  | <input type="checkbox"/> | <input type="checkbox"/> |
| Zanubrutinib                                                              | <input type="checkbox"/> | <input type="checkbox"/> |
| Other                                                                     | <input type="checkbox"/> | <input type="checkbox"/> |
| Unknown                                                                   | <input type="checkbox"/> | <input type="checkbox"/> |

- Multiple Myeloma** -and/or-
- Primary AL Amyloidosis** -and/or-
- POEMS**

→ If Yes, what treatments did your patient receive in the last 12 months and which was the most recent treatment prior to COVID-19 diagnosis?

Patient DID NOT have treatment in the past year

Patient DID have treatment in the past year

| Treatment        | Last 12 Months           | Last Prior to COVID-19 Diagnosis |
|------------------|--------------------------|----------------------------------|
| Bortezomib       | <input type="checkbox"/> | <input type="checkbox"/>         |
| Carfilzomib      | <input type="checkbox"/> | <input type="checkbox"/>         |
| Ixazomib         | <input type="checkbox"/> | <input type="checkbox"/>         |
| Dexamethasone    | <input type="checkbox"/> | <input type="checkbox"/>         |
| Lenalidomide     | <input type="checkbox"/> | <input type="checkbox"/>         |
| Pomalidomide     | <input type="checkbox"/> | <input type="checkbox"/>         |
| Thalidomide      | <input type="checkbox"/> | <input type="checkbox"/>         |
| Cyclophosphamide | <input type="checkbox"/> | <input type="checkbox"/>         |
| Daratumumab      | <input type="checkbox"/> | <input type="checkbox"/>         |
| Elotuzumab       | <input type="checkbox"/> | <input type="checkbox"/>         |
| Selinexor        | <input type="checkbox"/> | <input type="checkbox"/>         |
| Panobinostat     | <input type="checkbox"/> | <input type="checkbox"/>         |
| Ruxolitinib      | <input type="checkbox"/> | <input type="checkbox"/>         |
| Other            | <input type="checkbox"/> | <input type="checkbox"/>         |
| Unknown          | <input type="checkbox"/> | <input type="checkbox"/>         |

**The most recent hematologic malignancy treatment was being given to:**

- Induce remission with the intent of curing the hematologic malignancy
- Induce remission (partial or complete) with the intent of prolonging survival and/or improving symptoms of the hematologic malignancy
- Maintain remission
- Reduce symptoms of the hematologic malignancy or to decrease transfusion burden (i.e. no expectation of inducing remission)
- Other
- Unknown

**When did Your patient receive their most recent treatment for their hematologic malignancy, relative to the time of their COVID-19 diagnosis?**

- Received treatment at the time of COVID-19 diagnosis
- 1 year - 2 years prior to COVID-19 diagnosis
- Within past 3 months prior to COVID-19 diagnosis
- > 2 years prior to COVID-19 diagnosis

| <input type="radio"/> 3 months - 6 months prior to COVID-19 diagnosis<br><input type="radio"/> 6 months - 1 year prior to COVID-19 diagnosis                                                                                                                                                                                                                                                                                                                                                                                                                                                                                                                         | <input type="radio"/> Unknown                                                                                                                                                                                                                                                                                                                                                                                                                                                                                                                                                                                                                                                                                                                                                                                                                                                                                                                                                                                                                                                                                                                                                                                                           |                          |                           |                          |                |                       |                       |                                                              |                       |                       |                                                          |                       |                       |                                                                   |                       |                       |                                            |                       |                       |
|----------------------------------------------------------------------------------------------------------------------------------------------------------------------------------------------------------------------------------------------------------------------------------------------------------------------------------------------------------------------------------------------------------------------------------------------------------------------------------------------------------------------------------------------------------------------------------------------------------------------------------------------------------------------|-----------------------------------------------------------------------------------------------------------------------------------------------------------------------------------------------------------------------------------------------------------------------------------------------------------------------------------------------------------------------------------------------------------------------------------------------------------------------------------------------------------------------------------------------------------------------------------------------------------------------------------------------------------------------------------------------------------------------------------------------------------------------------------------------------------------------------------------------------------------------------------------------------------------------------------------------------------------------------------------------------------------------------------------------------------------------------------------------------------------------------------------------------------------------------------------------------------------------------------------|--------------------------|---------------------------|--------------------------|----------------|-----------------------|-----------------------|--------------------------------------------------------------|-----------------------|-----------------------|----------------------------------------------------------|-----------------------|-----------------------|-------------------------------------------------------------------|-----------------------|-----------------------|--------------------------------------------|-----------------------|-----------------------|
| <b>Did the patient receive any of the following prior to the COVID-19 diagnosis?</b>                                                                                                                                                                                                                                                                                                                                                                                                                                                                                                                                                                                 |                                                                                                                                                                                                                                                                                                                                                                                                                                                                                                                                                                                                                                                                                                                                                                                                                                                                                                                                                                                                                                                                                                                                                                                                                                         |                          |                           |                          |                |                       |                       |                                                              |                       |                       |                                                          |                       |                       |                                                                   |                       |                       |                                            |                       |                       |
| <input type="checkbox"/> Autologous stem cell transplant<br><input type="checkbox"/> CAR-T cells<br><input type="checkbox"/> Haplo-identical allogeneic stem cell transplant                                                                                                                                                                                                                                                                                                                                                                                                                                                                                         | <input type="checkbox"/> Matched related donor allogeneic stem cell transplant<br><input type="checkbox"/> Matched unrelated donor allogeneic stem cell transplant<br><input type="checkbox"/> Unknown                                                                                                                                                                                                                                                                                                                                                                                                                                                                                                                                                                                                                                                                                                                                                                                                                                                                                                                                                                                                                                  |                          |                           |                          |                |                       |                       |                                                              |                       |                       |                                                          |                       |                       |                                                                   |                       |                       |                                            |                       |                       |
| <b>Was an autologous stem cell transplant given at any time?</b> <input type="radio"/> Yes <input type="radio"/> No <input type="radio"/> Unknown<br><b>→If Yes, How Many Days Before the COVID-19 Diagnosis did the Autologous Stem Cell Transplant Occur?</b><br><input type="radio"/> <21 days (3 weeks) prior to COVID-19 diagnosis <input type="radio"/> Between 21 - 100 days prior to COVID-19 diagnosis<br><input type="radio"/> Between 101 - 365 days prior to COVID-19 diagnosis <input type="radio"/> >365 days prior to COVID-19 diagnosis<br><input type="radio"/> Unknown                                                                             |                                                                                                                                                                                                                                                                                                                                                                                                                                                                                                                                                                                                                                                                                                                                                                                                                                                                                                                                                                                                                                                                                                                                                                                                                                         |                          |                           |                          |                |                       |                       |                                                              |                       |                       |                                                          |                       |                       |                                                                   |                       |                       |                                            |                       |                       |
| <b>Was an Allogeneic Stem Cell Transplant Given at any Time?</b> <input type="radio"/> Yes <input type="radio"/> No <input type="radio"/> Unknown<br><b>→If Yes, How Many Days Before the COVID-19 Diagnosis did the Allogeneic Stem Cell Transplant Occur?</b><br><input type="radio"/> <21 days (3 weeks) prior to COVID-19 diagnosis <input type="radio"/> Between 21-100 days prior to COVID-19 diagnosis<br><input type="radio"/> Between 101-365 days prior to COVID-19 diagnosis <input type="radio"/> >365 days prior to COVID-19 diagnosis<br><input type="radio"/> Unknown                                                                                 |                                                                                                                                                                                                                                                                                                                                                                                                                                                                                                                                                                                                                                                                                                                                                                                                                                                                                                                                                                                                                                                                                                                                                                                                                                         |                          |                           |                          |                |                       |                       |                                                              |                       |                       |                                                          |                       |                       |                                                                   |                       |                       |                                            |                       |                       |
| <b>Did the patient have GVHD at the time of COVID-19 diagnosis?</b> <input type="radio"/> Yes <input type="radio"/> No <input type="radio"/> Unknown<br><b>→If Yes:</b> <input type="radio"/> Acute GVHD <input type="radio"/> Chronic GVHD<br><b>→If Yes, was the patient on treatment for GVHD?</b> <input type="radio"/> Yes <input type="radio"/> No <input type="radio"/> Unknown<br><b>→If Yes: Was the Stem Cell Graft Tested for SARS-CoV-2 (the virus that causes COVID-19)?</b><br><input type="radio"/> Yes <input type="radio"/> No <input type="radio"/> Unknown <input type="radio"/> Not applicable, the graft was collected before COVID-19 pandemic |                                                                                                                                                                                                                                                                                                                                                                                                                                                                                                                                                                                                                                                                                                                                                                                                                                                                                                                                                                                                                                                                                                                                                                                                                                         |                          |                           |                          |                |                       |                       |                                                              |                       |                       |                                                          |                       |                       |                                                                   |                       |                       |                                            |                       |                       |
| <b>What was the status of your patient's hematologic malignancy at the time of their COVID-19 diagnosis?</b><br><input type="radio"/> Initial diagnosis <input type="radio"/> In remission not on treatment <input type="radio"/> Stable but not in remission<br><input type="radio"/> In remission on consolidation or maintenance treatment <input type="radio"/> Relapsed or refractory<br><input type="radio"/> Unknown                                                                                                                                                                                                                                          |                                                                                                                                                                                                                                                                                                                                                                                                                                                                                                                                                                                                                                                                                                                                                                                                                                                                                                                                                                                                                                                                                                                                                                                                                                         |                          |                           |                          |                |                       |                       |                                                              |                       |                       |                                                          |                       |                       |                                                                   |                       |                       |                                            |                       |                       |
| <b>Taking into account all relevant factors (age, comorbidities, underlying hematologic condition), what do you estimate your patient's overall prognosis for survival was before COVID-19 Diagnosis?</b><br><input type="radio"/> < 3 months <input type="radio"/> 3 - 6 months <input type="radio"/> 6 - 12 months <input type="radio"/> > 12 months                                                                                                                                                                                                                                                                                                               |                                                                                                                                                                                                                                                                                                                                                                                                                                                                                                                                                                                                                                                                                                                                                                                                                                                                                                                                                                                                                                                                                                                                                                                                                                         |                          |                           |                          |                |                       |                       |                                                              |                       |                       |                                                          |                       |                       |                                                                   |                       |                       |                                            |                       |                       |
| <b>Were changes made to the patient's blood cancer treatment plan <i>BEFORE and/or AFTER</i> COVID-19 Diagnosis, as a result of the COVID-19 pandemic?</b>                                                                                                                                                                                                                                                                                                                                                                                                                                                                                                           |                                                                                                                                                                                                                                                                                                                                                                                                                                                                                                                                                                                                                                                                                                                                                                                                                                                                                                                                                                                                                                                                                                                                                                                                                                         |                          |                           |                          |                |                       |                       |                                                              |                       |                       |                                                          |                       |                       |                                                                   |                       |                       |                                            |                       |                       |
|                                                                                                                                                                                                                                                                                                                                                                                                                                                                                                                                                                                                                                                                      | <table border="1" style="width: 100%; border-collapse: collapse;"> <thead> <tr> <th style="width: 60%;"></th> <th style="width: 20%;">Before COVID-19 Diagnosis</th> <th style="width: 20%;">After COVID-19 Diagnosis</th> </tr> </thead> <tbody> <tr> <td>No change made</td> <td style="text-align: center;"><input type="radio"/></td> <td style="text-align: center;"><input type="radio"/></td> </tr> <tr> <td>Blood cancer treatment stopped, no plan to restart treatment</td> <td style="text-align: center;"><input type="radio"/></td> <td style="text-align: center;"><input type="radio"/></td> </tr> <tr> <td>Blood cancer treatment stopped, plan to resume treatment</td> <td style="text-align: center;"><input type="radio"/></td> <td style="text-align: center;"><input type="radio"/></td> </tr> <tr> <td>Blood cancer treatment stopped, plan to start different treatment</td> <td style="text-align: center;"><input type="radio"/></td> <td style="text-align: center;"><input type="radio"/></td> </tr> <tr> <td>Changes made to treatment dose or schedule</td> <td style="text-align: center;"><input type="radio"/></td> <td style="text-align: center;"><input type="radio"/></td> </tr> </tbody> </table> |                          | Before COVID-19 Diagnosis | After COVID-19 Diagnosis | No change made | <input type="radio"/> | <input type="radio"/> | Blood cancer treatment stopped, no plan to restart treatment | <input type="radio"/> | <input type="radio"/> | Blood cancer treatment stopped, plan to resume treatment | <input type="radio"/> | <input type="radio"/> | Blood cancer treatment stopped, plan to start different treatment | <input type="radio"/> | <input type="radio"/> | Changes made to treatment dose or schedule | <input type="radio"/> | <input type="radio"/> |
|                                                                                                                                                                                                                                                                                                                                                                                                                                                                                                                                                                                                                                                                      | Before COVID-19 Diagnosis                                                                                                                                                                                                                                                                                                                                                                                                                                                                                                                                                                                                                                                                                                                                                                                                                                                                                                                                                                                                                                                                                                                                                                                                               | After COVID-19 Diagnosis |                           |                          |                |                       |                       |                                                              |                       |                       |                                                          |                       |                       |                                                                   |                       |                       |                                            |                       |                       |
| No change made                                                                                                                                                                                                                                                                                                                                                                                                                                                                                                                                                                                                                                                       | <input type="radio"/>                                                                                                                                                                                                                                                                                                                                                                                                                                                                                                                                                                                                                                                                                                                                                                                                                                                                                                                                                                                                                                                                                                                                                                                                                   | <input type="radio"/>    |                           |                          |                |                       |                       |                                                              |                       |                       |                                                          |                       |                       |                                                                   |                       |                       |                                            |                       |                       |
| Blood cancer treatment stopped, no plan to restart treatment                                                                                                                                                                                                                                                                                                                                                                                                                                                                                                                                                                                                         | <input type="radio"/>                                                                                                                                                                                                                                                                                                                                                                                                                                                                                                                                                                                                                                                                                                                                                                                                                                                                                                                                                                                                                                                                                                                                                                                                                   | <input type="radio"/>    |                           |                          |                |                       |                       |                                                              |                       |                       |                                                          |                       |                       |                                                                   |                       |                       |                                            |                       |                       |
| Blood cancer treatment stopped, plan to resume treatment                                                                                                                                                                                                                                                                                                                                                                                                                                                                                                                                                                                                             | <input type="radio"/>                                                                                                                                                                                                                                                                                                                                                                                                                                                                                                                                                                                                                                                                                                                                                                                                                                                                                                                                                                                                                                                                                                                                                                                                                   | <input type="radio"/>    |                           |                          |                |                       |                       |                                                              |                       |                       |                                                          |                       |                       |                                                                   |                       |                       |                                            |                       |                       |
| Blood cancer treatment stopped, plan to start different treatment                                                                                                                                                                                                                                                                                                                                                                                                                                                                                                                                                                                                    | <input type="radio"/>                                                                                                                                                                                                                                                                                                                                                                                                                                                                                                                                                                                                                                                                                                                                                                                                                                                                                                                                                                                                                                                                                                                                                                                                                   | <input type="radio"/>    |                           |                          |                |                       |                       |                                                              |                       |                       |                                                          |                       |                       |                                                                   |                       |                       |                                            |                       |                       |
| Changes made to treatment dose or schedule                                                                                                                                                                                                                                                                                                                                                                                                                                                                                                                                                                                                                           | <input type="radio"/>                                                                                                                                                                                                                                                                                                                                                                                                                                                                                                                                                                                                                                                                                                                                                                                                                                                                                                                                                                                                                                                                                                                                                                                                                   | <input type="radio"/>    |                           |                          |                |                       |                       |                                                              |                       |                       |                                                          |                       |                       |                                                                   |                       |                       |                                            |                       |                       |

**Post-COVID-19 Hematologic Complication Information**

**Which post-COVID-19 hematologic complications were known to have occurred?\***

- Coagulopathy
- Inflammatory Markers
- Venous Thromboembolism (VTE)

**Coagulopathy**

| Test                                      | On Admission (or First Measured)                                                                                                                                                                                                                                                                                                                                                                                                                                                                                                                                                                                                                                                                                                                                                                                                                                            | Peak or Nadir During Admission                                                                                                                                                                                                                                                                                                                                                                                                                                                                                                                                                                                                                                                                                                                                                                                                                                              |
|-------------------------------------------|-----------------------------------------------------------------------------------------------------------------------------------------------------------------------------------------------------------------------------------------------------------------------------------------------------------------------------------------------------------------------------------------------------------------------------------------------------------------------------------------------------------------------------------------------------------------------------------------------------------------------------------------------------------------------------------------------------------------------------------------------------------------------------------------------------------------------------------------------------------------------------|-----------------------------------------------------------------------------------------------------------------------------------------------------------------------------------------------------------------------------------------------------------------------------------------------------------------------------------------------------------------------------------------------------------------------------------------------------------------------------------------------------------------------------------------------------------------------------------------------------------------------------------------------------------------------------------------------------------------------------------------------------------------------------------------------------------------------------------------------------------------------------|
| <b>Prothrombin Time (PT)</b>              | <input type="radio"/> Not measured <input type="radio"/> Normal<br><input type="radio"/> Prolonged<br><b>→ If Yes, indicate degree of prolongation:</b><br><input type="radio"/> < 3 sec <input type="radio"/> 3 – 6 sec <input type="radio"/> >6 sec                                                                                                                                                                                                                                                                                                                                                                                                                                                                                                                                                                                                                       | <input type="radio"/> Not measured <input type="radio"/> Normal<br><input type="radio"/> Prolonged<br><b>→ If Yes, indicate degree of prolongation:</b><br><input type="radio"/> < 3 sec <input type="radio"/> 3 – 6 sec <input type="radio"/> >6 sec                                                                                                                                                                                                                                                                                                                                                                                                                                                                                                                                                                                                                       |
| <b>INR</b>                                | <input type="radio"/> Not measured <input type="radio"/> Normal<br><input type="radio"/> Elevated (otherwise unexplained)<br><b>→ If Yes, indicate level: _____</b><br><input type="radio"/> Elevated in the presence of VKA, known vitamin K deficiency, coagulopathy of chronic liver disease, trauma, massive transfusion                                                                                                                                                                                                                                                                                                                                                                                                                                                                                                                                                | <input type="radio"/> Not measured <input type="radio"/> Normal<br><input type="radio"/> Elevated (otherwise unexplained)<br><b>→ If Yes, indicate level: _____</b><br><input type="radio"/> Elevated in the presence of VKA, known vitamin K deficiency, coagulopathy of chronic liver disease, trauma, massive transfusion                                                                                                                                                                                                                                                                                                                                                                                                                                                                                                                                                |
| <b>Partial thromboplastin time (aPTT)</b> | <input type="radio"/> Not measured <input type="radio"/> Normal<br><input type="radio"/> Prolonged <b>→If Yes, indicate longest degree of prolongation:</b><br><input type="radio"/> < 3 sec <input type="radio"/> 3 – 6 sec <input type="radio"/> >6 sec                                                                                                                                                                                                                                                                                                                                                                                                                                                                                                                                                                                                                   | <input type="radio"/> Not measured <input type="radio"/> Normal<br><input type="radio"/> Prolonged <b>→If Yes, indicate longest degree of prolongation:</b><br><input type="radio"/> < 3 sec <input type="radio"/> 3 – 6 sec <input type="radio"/> >6 sec                                                                                                                                                                                                                                                                                                                                                                                                                                                                                                                                                                                                                   |
| <b>Fibrinogen</b>                         | <input type="radio"/> Not measured<br><input type="radio"/> Measured <b>→ Indicate level: _____</b><br><b>→ Indicate units:</b><br><input type="radio"/> g/L <input type="radio"/> mg/dL                                                                                                                                                                                                                                                                                                                                                                                                                                                                                                                                                                                                                                                                                    | <input type="radio"/> Not measured<br><input type="radio"/> Measured <b>→ Indicate level: _____</b><br><b>→ Indicate units:</b><br><input type="radio"/> g/L <input type="radio"/> mg/dL                                                                                                                                                                                                                                                                                                                                                                                                                                                                                                                                                                                                                                                                                    |
| <b>D-dimer</b>                            | <b>Was D-dimer measured?</b><br><input type="radio"/> No <input type="radio"/> Yes<br><b>→ If Yes, is the type of D-dimer assay known?</b><br><input type="radio"/> No <b>→ Indicate level of D-dimer relative to cut off value:</b><br><input type="radio"/> below lab cut off<br><input type="radio"/> 1 - 1.9X cut off value<br><input type="radio"/> 2 - 2.9X cut off value<br><input type="radio"/> 3 - 3.9X cut off value<br><input type="radio"/> 4 - 4.9X cut off value<br><input type="radio"/> 5 - 5.9X cut off value<br><input type="radio"/> 6 - 6.9X cut off value<br><input type="radio"/> 7 - 7.9X cut off value<br><input type="radio"/> 8 - 8.9X cut off value<br><input type="radio"/> 9 - 9.9X cut off value<br><input type="radio"/> ≥ 10X cut off value<br><input type="radio"/> > Upper limit of quantitation<br><b>→ Indicate upper limit: _____</b> | <b>Was D-dimer measured?</b><br><input type="radio"/> No <input type="radio"/> Yes<br><b>→ If Yes, is the type of D-dimer assay known?</b><br><input type="radio"/> No <b>→ Indicate level of D-dimer relative to cut off value:</b><br><input type="radio"/> below lab cut off<br><input type="radio"/> 1 - 1.9X cut off value<br><input type="radio"/> 2 - 2.9X cut off value<br><input type="radio"/> 3 - 3.9X cut off value<br><input type="radio"/> 4 - 4.9X cut off value<br><input type="radio"/> 5 - 5.9X cut off value<br><input type="radio"/> 6 - 6.9X cut off value<br><input type="radio"/> 7 - 7.9X cut off value<br><input type="radio"/> 8 - 8.9X cut off value<br><input type="radio"/> 9 - 9.9X cut off value<br><input type="radio"/> ≥ 10X cut off value<br><input type="radio"/> > Upper limit of quantitation<br><b>→ Indicate upper limit: _____</b> |

|                       |                                                                                                                                                                                                                                                                                                                                                                                                                                                                                                                                                                                                                                                                                                                                                                                                                                                                  |                                                                                                                                                                                                                                                                                                                                                                                                                                                                                                                                                                                                                                                                                                                                                                                                                                                   |
|-----------------------|------------------------------------------------------------------------------------------------------------------------------------------------------------------------------------------------------------------------------------------------------------------------------------------------------------------------------------------------------------------------------------------------------------------------------------------------------------------------------------------------------------------------------------------------------------------------------------------------------------------------------------------------------------------------------------------------------------------------------------------------------------------------------------------------------------------------------------------------------------------|---------------------------------------------------------------------------------------------------------------------------------------------------------------------------------------------------------------------------------------------------------------------------------------------------------------------------------------------------------------------------------------------------------------------------------------------------------------------------------------------------------------------------------------------------------------------------------------------------------------------------------------------------------------------------------------------------------------------------------------------------------------------------------------------------------------------------------------------------|
|                       | <input type="radio"/> Yes → <b>Indicate D-dimer assay used at institution:</b><br><input type="radio"/> IL HemosIL D-dimer<br><input type="radio"/> IL HemosIL D-dimer HS<br><input type="radio"/> IL HemosILD-dimer HS500<br><input type="radio"/> Radiometer AQT90 Flex<br><input type="radio"/> Siemens Innovance<br><input type="radio"/> Siemens Acute Care<br><input type="radio"/> Stago/Roche Liatest D-dimer<br><input type="radio"/> Stago Liatest D-dimer Plus<br><input type="radio"/> Roche Cardiac Reader DD test<br><input type="radio"/> RocheTinaquant 2 <sup>nd</sup> gen<br><input type="radio"/> BioMerieux Vidas<br><input type="radio"/> Diagon Dia-D-Dimer<br><input type="radio"/> Beckman Coulter D-Dimer<br><input type="radio"/> Diagnostica STA Liatest<br><input type="radio"/> Other<br>→ Enter <u>initial</u> D-dimer value: ____ | <input type="radio"/> Yes → <b>Indicate D-dimer assay used at institution:</b><br><input type="radio"/> IL HemosIL D-dimer<br><input type="radio"/> IL HemosIL D-dimer HS<br><input type="radio"/> IL HemosILD-dimer HS500<br><input type="radio"/> Radiometer AQT90 Flex<br><input type="radio"/> Siemens Innovance<br><input type="radio"/> Siemens Acute Care<br><input type="radio"/> Stago/Roche Liatest D-dimer<br><input type="radio"/> Stago Liatest D-dimer Plus<br><input type="radio"/> Roche Cardiac Reader DD test<br><input type="radio"/> RocheTinaquant 2 <sup>nd</sup> gen<br><input type="radio"/> BioMerieux Vidas<br><input type="radio"/> Diagon Dia-D-Dimer<br><input type="radio"/> Beckman Coulter D-Dimer<br><input type="radio"/> Diagnostica STA Liatest<br><input type="radio"/> Other<br>→ Enter D-dimer value: ____ |
| <b>Platelet count</b> | _____ x 10 <sup>9</sup> /L                                                                                                                                                                                                                                                                                                                                                                                                                                                                                                                                                                                                                                                                                                                                                                                                                                       | _____ x 10 <sup>9</sup> /L                                                                                                                                                                                                                                                                                                                                                                                                                                                                                                                                                                                                                                                                                                                                                                                                                        |

**Blood Product and Hemostatic Treatments**

→Did the patient receive any blood components?

- If Yes:     Red blood cells                       Whole blood                       Plasma transfusion  
 Convalescent plasma                       Platelet transfusion                       Cryoprecipitate  
 Fibrinogen concentrate                       IVIG

→Did the patient receive any coagulation factors or natural anticoagulants?

- If Yes:     Recombinant VIIa                       Protein C concentrate                       Other  
 Antithrombin concentrate                       Activated protein C concentrate  
 Prothrombin complex concentrate                       Activated prothrombin complex concentrate

→Did the patient receive any antifibrinolytic therapy?

- If Yes:     Tranexamic acid                       Epsilon amino caproic acid

**Antithrombotic Therapies**

→Did the patient receive any of the following anticoagulant therapies for prevention of thrombosis?

- Unknown
- No anticoagulant therapies given
- Low molecular weight heparin → **If Yes, indicate dose intensity:**
  - Standard prophylactic dose                       Intermediate dose
  - Weight-based prophylactic dose                       Therapeutic dose
- Unfractionated heparin (intravenous)
- Unfractionated heparin (subcutaneous)
  - **If Yes, indicate dose intensity:**
    - Low dose (5000 units every 8 or 12 hours)
    - Therapeutic dose (initial dose 333 U/kg then 250 U/kg every 12 hours)
- fondaparinux → **If Yes, indicate dose intensity:**
  - Low dose (2.5 mg once daily)
  - Intermediate dose (intermediate between low dose and therapeutic dose)

Therapeutic dose (5 mg for weight <50 kg, 7.5 mg for weight 50 to 100 kg, 10 mg for weight >100 kg)

apixaban → **If Yes, indicate dose:**

2.5 mg twice daily       5 mg twice daily       10 mg twice daily

rivaroxaban → **If Yes, indicate dose:**

10 mg once daily       15 mg once daily       20 mg once daily  
 2.5 mg twice daily       15 mg twice daily

edoxaban → **If Yes, indicate dose:**

30 mg once daily       60 mg once daily

dabigatran → **If Yes, indicate dose:**

75 mg twice daily       110 mg twice daily       150 mg twice daily

Betrixaban 80 mg once daily

warfarin → **If Yes, indicate target therapeutic range:**

INR 1.5 to 2.5       INR 2 to 3       INR 2.5 to 3.5

Unknown

Other

**Venous Thromboembolism (VTE)**

→ Indicate number of days from COVID-19 diagnosis to VTE diagnosis: \_\_\_\_\_

→ Patient location at time of VTE diagnosis:

Outpatient (non-hospitalized)

→ **If Yes, history of VTE?**

No history of VTE

Prior history of VTE

→ **If Yes:**  Prior provoked VTE       Prior unprovoked VTE       Unknown

→ **Indicate whether was the patient was receiving anticoagulant therapy at the time of COVID-19-associated VTE:**  No       Yes → **If Yes, indicate type of anticoagulant:**

Low molecular weight heparin → **If Yes, indicate dose intensity:**

Standard prophylactic dose

Intermediate dose

Weight-adjusted prophylactic dose

Therapeutic dose

fondaparinux → **If Yes, indicate dose intensity:**

Low dose (2.5 mg once daily)

Intermediate dose (intermediate between low dose and therapeutic dose)

Therapeutic dose (5 mg for weight <50 kg, 7.5 mg for weight 50 to 100 kg, 10 mg for weight >100 kg)

apixaban → **If Yes, indicate dose:**

2.5 mg twice daily       5 mg twice daily       10 mg twice daily

rivaroxaban → **If Yes, indicate dose:**

10 mg once daily       15 mg once daily       20 mg once daily

2.5 mg twice daily       15 mg twice daily

edoxaban → **If Yes, indicate dose:**

30 mg once daily       60 mg once daily

dabigatran → **If Yes, indicate dose:**

75 mg twice daily       110 mg twice daily       150 mg twice daily

Betrixaban 80 mg once daily

warfarin → **If Yes, indicate target therapeutic range:**

INR 1.5 to 2.5

INR 2 to 3

INR 2.5 to 3.5

Unknown

Other

→ **Indicate indication for anticoagulation:**

Previous VTE

Atrial fibrillation

Mechanical heart valve

Left ventricular assist device

Left ventricular thrombus

Unknown

Coronary artery and/or peripheral artery disease

Other

Prevention of VTE (e.g. after hospital discharge, orthopedic surgery, ambulatory cancer patient on chemotherapy)

→ **Indicate whether the patient was receiving antiplatelet therapy at the time of COVID-19-associated VTE:**

No antiplatelet therapy

Single agent antiplatelet therapy

Dual antiplatelet therapy

→ **Persistent risk factor(s):**

Unknown

No persistent risk factors

Active cancer (potentially curative treatment not given, known recurrent or progressive disease, or treatment is ongoing)

Chronic inflammatory condition (e.g. inflammatory bowel disease, chronic infection)

Non-ambulatory (e.g. wheelchair, bed-bound)

Known objectively confirmed antiphospholipid antibody syndrome

Known objectively confirmed high risk inherited thrombophilia (homozygous factor V Leiden, homozygous prothrombin gene mutation G20210A, compound heterozygosity for factor V Leiden/prothrombin gene mutation G20210A, protein C deficiency, protein S deficiency, antithrombin deficiency, other multiple inherited thrombophilias)

Known objectively confirmed low risk inherited thrombophilia (heterozygous factor V Leiden, or heterozygous prothrombin gene mutation G20210A)

Obesity

→ **If Yes, BMI category:**

BMI not known

30-39.9

40-49.9

>50

→ **If Yes, enter actual body weight (kg):** \_\_\_\_\_  Not known

→ **Major transient risk factor(s) present within 3 months before VTE diagnosis:**

No major transient risk factors

Surgery with general anesthesia > 30 minutes

Indwelling central venous catheter

Caesarian section

Hospitalized and confined to bed for 3 days or longer with acute illness

→ **Minor transient risk factor(s) present within 2 months before VTE diagnosis:**

No minor transient risk factors

Hospitalization for < 3 days with acute illness

Surgery with general anesthesia < 30 minutes

Pregnancy / puerperium

Exogenous estrogen use

Confined to bed at home for 3 or more days with acute illness

Leg injury associated with reduced mobility for at least 3 days

Inpatient (hospitalized)

→ **If Yes, indicate supportive therapies at the time of VTE diagnosis:**

Respiratory support



→ **If Yes:**  High flow oxygen (>5L)

Non-invasive mechanical ventilation (e.g. CPAP, BiPAP)

Invasive mechanical ventilation

Additional life support therapies:

Vasopressors and/or inotropes

Renal replacement therapy (intermittent or continuous)

ECMO

→ **Number of days in hospital at the time of VTE diagnosis:** \_\_\_\_\_

→ **History of VTE:**

No history of VTE

Prior history of VTE

→ **If Yes, select all that apply:**

Prior provoked VTE

Prior unprovoked VTE

Unknown

→ **Additional VTE risk factor(s):**

Unknown

No additional risk factors

Non-ambulatory (e.g. wheelchair, bed-bound)

Active cancer (potentially curative treatment not given; or known recurrent or progressive disease), or treatment is ongoing)

Chronic inflammatory condition (e.g. inflammatory bowel disease, chronic inflammatory condition, chronic infection)

Known objectively confirmed antiphospholipid antibody syndrome

known objectively confirmed high risk inherited thrombophilia (homozygous factor V Leiden, protein C deficiency, protein S deficiency, antithrombin deficiency, multiple inherited thrombophilias such as compound heterozygosity for factor V Leiden/prothrombin gene mutation G20210A)

Heparin induced thrombocytopenia

Indwelling central venous catheter

Laboratory evidence of coagulopathy (otherwise unexplained prolonged PT, prolonged aPTT or abnormal INR, elevated D-dimer, abnormal fibrinogen)

Obesity

→ **If Yes, BMI category:**

BMI not known

30-39.9

40-49.9

>50

→ **If Yes, enter actual body weight (kg):** \_\_\_\_\_  Not known

→ **Indicate whether the patient was receiving antiplatelet therapy at the time of COVID-19-associated VTE:**

No antiplatelet therapy

Single agent antiplatelet therapy

Dual antiplatelet therapy

→ **Indicate whether was the patient was receiving any of the following treatments *at the time of VTE diagnosis*:**

No

Yes

→ **If Yes, indicate type:**

No anticoagulant or mechanical thromboprophylaxis

Mechanical thromboprophylaxis only (e.g. intermittent pneumatic compression)

Anticoagulation (with or without mechanical thromboprophylaxis)

→ **If Yes, indicate the type and dose of anticoagulant used:**

Low molecular weight heparin → **If Yes, indicate dose intensity:**

Standard prophylactic dose

Intermediate dose

Weight-adjusted prophylactic dose

Therapeutic dose

Unfractionated heparin (intravenous)

- Unfractionated heparin (subcutaneous) → **If Yes, indicate dose intensity:**
  - low dose (5000 units every 8 or 12 hours)
  - therapeutic dose
- fondaparinux → **If Yes, indicate dose intensity:**
  - Low dose (2.5 mg once daily)
  - Intermediate dose (intermediate between low dose and therapeutic dose)
  - Therapeutic dose (5 mg for weight <50 kg, 7.5 mg for weight 50 to 100 kg, 10 mg for weight >100 kg)
- apixaban → **If Yes, indicate dose:**
  - 2.5 mg twice daily       5 mg twice daily       10 mg twice daily
- rivaroxaban → **If Yes, indicate dose:**
  - 20 mg once daily       10 mg once daily       15 mg once daily
  - 2.5 mg twice daily       15 mg twice daily
- edoxaban → **If Yes, indicate dose:**
  - 30 mg once daily       60 mg once daily
- dabigatran → **If Yes, indicate dose:**
  - 75 mg twice daily       110 mg twice daily       150 mg twice daily
- Betrixaban
- warfarin → **If Yes, indicate target therapeutic range:**
  - INR 1.5 to 2.5       INR 2 to 3       INR 2.5 to 3.5
- Unknown
- Other

**Diagnosis of VTE**

- Objectively confirmed → **If Yes:**
  - PE →
    - CT pulmonary angiogram
    - Other type of CT (e.g. CT chest, CT abdomen/pelvis)
    - Ventilation-Perfusion scan (V/Q scan)
    - MRI
  - DVT →
    - Compression ultrasound without doppler
    - Compression ultrasound with doppler
    - Point of care ultrasound
    - CT
    - MRI

Clinical/Empirical diagnosis only

→ **If Yes, indicate reason(s) objective confirmation not done:**

- Unable to obtain imaging due to clinical status of patient (e.g. hemodynamically unstable)
- Unable to obtain imaging due to resource limitations (e.g. timely imaging not available)
- Unable to obtain imaging due to need for patient isolation
- Unknown
- Other

**Type of Venous Thromboembolism (VTE)**

Deep vein thrombosis (DVT)

→ **If Yes, select all that apply:**

Lower extremity DVT

→ **If Yes, select the most proximal involved veins:**

- Proximal veins (popliteal or more proximal veins)
- Calf veins (trifurcation or more distal veins)

Unknown

→ If Yes, Associated with central venous catheter (e.g. femoral dialysis line)?

Yes  No  Unknown

Upper extremity/neck DVT → If Yes, associated with central venous catheter?

Yes  No  Unknown

Unusual site DVT (e.g. splanchnic, cerebral)

Pulmonary embolism (PE) → If Yes, indicate most proximal pulmonary arteries involved (choose one)

Subsegmental pulmonary arteries only

Segmental or larger pulmonary artery → If Yes, select one of the following outcomes:

Non-fatal PE  Fatal PE  Death – other cause  Death - unknown if PE related

Unknown (i.e. presumed PE due to inability to obtain imaging and based on clinical presentation and ancillary tests e.g. echocardiogram)

Thrombosis of dialysis circuit (e.g. continuous renal replacement therapy filter) or ECMO

### Laboratory Tests Assessing Venous Thromboembolism (VTE)

| Test                                      | On admission (or first measured)                                                                                                                                                                                                                                                                                                                                                                                                                                                         | At time of VTE Diagnosis                                                                                                                                                                                                                                                                                                                                                                                                                                                                 |
|-------------------------------------------|------------------------------------------------------------------------------------------------------------------------------------------------------------------------------------------------------------------------------------------------------------------------------------------------------------------------------------------------------------------------------------------------------------------------------------------------------------------------------------------|------------------------------------------------------------------------------------------------------------------------------------------------------------------------------------------------------------------------------------------------------------------------------------------------------------------------------------------------------------------------------------------------------------------------------------------------------------------------------------------|
| <b>Prothrombin Time (PT)</b>              | <input type="radio"/> Not measured <input type="radio"/> Normal<br><input type="radio"/> Prolonged<br>→ If Yes, indicate degree of prolongation:<br><input type="radio"/> < 3 sec <input type="radio"/> 3 – 6 sec <input type="radio"/> > 6 sec                                                                                                                                                                                                                                          | <input type="radio"/> Not measured <input type="radio"/> Normal<br><input type="radio"/> Prolonged<br>→ If Yes, indicate degree of prolongation:<br><input type="radio"/> < 3 sec <input type="radio"/> 3 – 6 sec <input type="radio"/> > 6 sec                                                                                                                                                                                                                                          |
| <b>INR</b>                                | <input type="radio"/> Not measured<br><input type="radio"/> Normal<br><input type="radio"/> Elevated (otherwise unexplained)<br>→ If Yes, indicate level: _____<br><input type="radio"/> Elevated in the presence of VKA, known vitamin K deficiency, coagulopathy of chronic liver disease, trauma, massive transfusion                                                                                                                                                                 | <input type="radio"/> Not measured<br><input type="radio"/> Normal<br><input type="radio"/> Elevated (otherwise unexplained)<br>→ If Yes, indicate level: _____<br><input type="radio"/> Elevated in the presence of VKA, known vitamin K deficiency, coagulopathy of chronic liver disease, trauma, massive transfusion                                                                                                                                                                 |
| <b>Partial thromboplastin time (aPTT)</b> | <input type="radio"/> Not measured <input type="radio"/> Normal<br><input type="radio"/> Prolonged → If Yes, indicate longest degree of prolongation:<br><input type="radio"/> < 3 sec <input type="radio"/> 3 – 6 sec <input type="radio"/> > 6 sec                                                                                                                                                                                                                                     | <input type="radio"/> Not measured <input type="radio"/> Normal<br><input type="radio"/> Prolonged → If Yes, indicate longest degree of prolongation:<br><input type="radio"/> < 3 sec <input type="radio"/> 3 – 6 sec <input type="radio"/> > 6 sec                                                                                                                                                                                                                                     |
| <b>Fibrinogen</b>                         | <input type="radio"/> Not measured<br><input type="radio"/> Measured → Indicate level: _____<br>→ Indicate units:<br><input type="radio"/> g/L <input type="radio"/> mg/dL                                                                                                                                                                                                                                                                                                               | <input type="radio"/> Not measured<br><input type="radio"/> Measured → Indicate level: _____<br>→ Indicate units:<br><input type="radio"/> g/L <input type="radio"/> mg/dL                                                                                                                                                                                                                                                                                                               |
| <b>D-dimer</b>                            | <input type="radio"/> Not measured<br><input type="radio"/> Measured → Is the type of D-dimer assay known?<br><input type="radio"/> No → Indicate level of D-dimer relative to cut off value:<br><input type="radio"/> below lab cut off<br><input type="radio"/> 1 - 1.9X cut off value<br><input type="radio"/> 2 - 2.9X cut off value<br><input type="radio"/> 3 - 3.9X cut off value<br><input type="radio"/> 4 - 4.9X cut off value<br><input type="radio"/> 5 - 5.9X cut off value | <input type="radio"/> Not measured<br><input type="radio"/> Measured → Is the type of D-dimer assay known?<br><input type="radio"/> No → Indicate level of D-dimer relative to cut off value:<br><input type="radio"/> below lab cut off<br><input type="radio"/> 1 - 1.9X cut off value<br><input type="radio"/> 2 - 2.9X cut off value<br><input type="radio"/> 3 - 3.9X cut off value<br><input type="radio"/> 4 - 4.9X cut off value<br><input type="radio"/> 5 - 5.9X cut off value |

|                       |                                                                                                                                                                                                                                                                                                                                                                                                                                                                                                                                                                                                                                                                                                                                                                                                                                                                                                                                                                                                                                                                                                                                                                                                                    |                                                                                                                                                                                                                                                                                                                                                                                                                                                                                                                                                                                                                                                                                                                                                                                                                                                                                                                                                                                                                                                                                                                                                                                                            |
|-----------------------|--------------------------------------------------------------------------------------------------------------------------------------------------------------------------------------------------------------------------------------------------------------------------------------------------------------------------------------------------------------------------------------------------------------------------------------------------------------------------------------------------------------------------------------------------------------------------------------------------------------------------------------------------------------------------------------------------------------------------------------------------------------------------------------------------------------------------------------------------------------------------------------------------------------------------------------------------------------------------------------------------------------------------------------------------------------------------------------------------------------------------------------------------------------------------------------------------------------------|------------------------------------------------------------------------------------------------------------------------------------------------------------------------------------------------------------------------------------------------------------------------------------------------------------------------------------------------------------------------------------------------------------------------------------------------------------------------------------------------------------------------------------------------------------------------------------------------------------------------------------------------------------------------------------------------------------------------------------------------------------------------------------------------------------------------------------------------------------------------------------------------------------------------------------------------------------------------------------------------------------------------------------------------------------------------------------------------------------------------------------------------------------------------------------------------------------|
|                       | <input type="radio"/> 6 - 6.9X cut off value<br><input type="radio"/> 7 - 7.9X cut off value<br><input type="radio"/> 8 - 8.9X cut off value<br><input type="radio"/> 9 - 9.9X cut off value<br><input type="radio"/> $\geq 10X$ cut off value<br><input type="radio"/> > upper limit of quantitation<br><b>→ Indicate upper limit: _____</b><br><input type="radio"/> Yes <b>→ Indicate D-dimer assay used at institution:</b><br><input type="radio"/> IL HemosIL D-dimer<br><input type="radio"/> IL HemosIL D-dimer HS<br><input type="radio"/> IL HemosILD-dimer HS500<br><input type="radio"/> Radiometer AQT90 Flex<br><input type="radio"/> Siemens Innovance<br><input type="radio"/> Siemens Acute Care<br><input type="radio"/> Stago/Roche Liatest D-dimer<br><input type="radio"/> Stago Liatest D-dimer Plus<br><input type="radio"/> Roche Cardiac Reader DD test<br><input type="radio"/> RocheTinaquant 2 <sup>nd</sup> gen<br><input type="radio"/> BioMerieux Vidas<br><input type="radio"/> Diagon Dia-D-Dimer<br><input type="radio"/> Beckman Coulter D-Dimer<br><input type="radio"/> Diagnostica STA Liatest<br><input type="radio"/> Other<br><b>→ Enter initial D-dimer value: _____</b> | <input type="radio"/> 6 - 6.9X cut off value<br><input type="radio"/> 7 - 7.9X cut off value<br><input type="radio"/> 8 - 8.9X cut off value<br><input type="radio"/> 9 - 9.9X cut off value<br><input type="radio"/> $\geq 10X$ cut off value<br><input type="radio"/> > upper limit of quantitation<br><b>→ Indicate upper limit: _____</b><br><input type="radio"/> Yes <b>→ Indicate D-dimer assay used at institution:</b><br><input type="radio"/> IL HemosIL D-dimer<br><input type="radio"/> IL HemosIL D-dimer HS<br><input type="radio"/> IL HemosILD-dimer HS500<br><input type="radio"/> Radiometer AQT90 Flex<br><input type="radio"/> Siemens Innovance<br><input type="radio"/> Siemens Acute Care<br><input type="radio"/> Stago/Roche Liatest D-dimer<br><input type="radio"/> Stago Liatest D-dimer Plus<br><input type="radio"/> Roche Cardiac Reader DD test<br><input type="radio"/> RocheTinaquant 2 <sup>nd</sup> gen<br><input type="radio"/> BioMerieux Vidas<br><input type="radio"/> Diagon Dia-D-Dimer<br><input type="radio"/> Beckman Coulter D-Dimer<br><input type="radio"/> Diagnostica STA Liatest<br><input type="radio"/> Other<br><b>→ Enter D-dimer value: _____</b> |
| <b>Platelet count</b> | _____ x 10 <sup>9</sup> /L                                                                                                                                                                                                                                                                                                                                                                                                                                                                                                                                                                                                                                                                                                                                                                                                                                                                                                                                                                                                                                                                                                                                                                                         | _____ x 10 <sup>9</sup> /L                                                                                                                                                                                                                                                                                                                                                                                                                                                                                                                                                                                                                                                                                                                                                                                                                                                                                                                                                                                                                                                                                                                                                                                 |

**Anticoagulant Treatment of Acute VTE:**

- Low molecular weight heparin **→ If Yes, indicate dose intensity:**  
 Standard prophylactic dose       Weight-based prophylactic dose  
 Intermediate dose       Therapeutic dose
- Unfractionated heparin (intravenous) **→ If Yes, indicate dose intensity:**  
 Low dose protocol       High dose protocol       Unknown
- Unfractionated heparin (subcutaneous) **→ If Yes, indicate dose intensity:**  
 Low dose (5000 units every 8 or 12 hours)  
 Therapeutic dose (e.g. initial dose 333 U/kg then 250 U/kg every 12 hrs)
- fondaparinux **→ If Yes, indicate dose intensity:**  
 Low dose (2.5 mg once daily)  
 Intermediate dose (intermediate between low dose and therapeutic dose)  
 Therapeutic dose (5 mg for weight <50 kg, 7.5 mg for weight 50 to 100 kg, 10 mg for weight >100 kg)
- apixaban **→ If Yes, indicate dose:**  
 2.5 mg twice daily       5 mg twice daily  
 10 mg twice daily x 7 days then 5 mg twice daily
- rivaroxaban **→ If Yes, indicate dose:**  
 10 mg once daily       15 mg once daily       20 mg once daily  
 2.5 mg twice daily       15 mg twice daily
- edoxaban **→ If Yes, indicate dose:**       30 mg once daily       60 mg once daily

→ If Yes, therapeutic LMWH of heparin given for 5-10 days before edoxaban started?  Yes  No

dabigatran → If Yes, indicate dose:

75 mg twice daily  110 mg twice daily  150 mg twice daily

→ If Yes, therapeutic LMWH of heparin given for 5-10 days before dabigatran started?  Yes  No

warfarin preceded by therapeutic LMWH → If Yes, indicate target therapeutic range:

INR 1.5 to 2.5  INR 2 to 3  INR 2.5 to 3.5

Unknown

Other

**Additional Interventions for VTE:**

Thrombolysis – systemic → If Yes, indicate dose:

TPA 50 mg  TPA 100 mg  Other  Unknown

Thrombolysis – catheter-directed

Mechanical thrombectomy

ECMO

Inferior vena cava filter insertion

Other

Unknown

**Bleeding Complications**

**Did the patient experience clinically relevant non-major bleeding or major bleeding (defined below) while receiving anticoagulant treatment for this VTE event (choose one)?**

Unknown

No

Clinically relevant non-major bleeding (ISTH) (defined as any sign of symptom of bleeding that does not fit the criteria for the ISTH definition of major bleeding but does meet at least one of the following criteria):

Required medical intervention by a healthcare professional

Lead to hospitalization or increased level of care

Prompted a face to face (i.e., not just a telephone or electronic communication) evaluation

Major bleeding (ISTH) (defined as symptomatic bleeding and at least one of the following):

Fatal bleeding

Bleeding in a critical area or organ, such as intracranial, intraspinal, intraocular, retroperitoneal, intra-articular or pericardial, or intramuscular with compartment syndrome

Bleeding causing a fall in hemoglobin level of 20 g/L (2 g/dL or 1.24 mmol/L) or more, or leading to transfusion of two or more units of whole blood or red cells

**Inflammatory Markers**

**Please indicate whether any of the following were present:**

Fever >38.5C → If Yes, indicate timing:

Timing unknown

Before or at diagnosis of COVID-19 → Number of days: \_\_\_\_\_

After diagnosis → Number of days: \_\_\_\_\_

Organomegaly

Cytopenias → If Yes:  Hemoglobin < 9 g/dL (< 90 g/L)

Platelet count < 100 x 10<sup>9</sup>/L

ANC <1.0

Triglyceride >3 mmol/L (>265 mg/dL)

Fibrinogen < 1.5 g/L (<150 mg/dL)

Ferritin > 500 ug/L (> 500 ng/mL) → If Yes, indicate peak ferritin: \_\_\_\_\_

sCD25 (SIL2-R) > 2400u/mL

Hemophagocytosis

SGOT/AST above normal range

**Were any immune-modulatory treatments given?**

No  Yes  Unknown

→ **If Yes, please select all that apply:**

- tocilizumab  ruxolitinib  corticosteroids  etoposide  
 siltuxumab  IVIG  Other

→ **If Yes, please indicate whether treatments were given as part of a research protocol:**

No  Yes  Unknown

**Cytopenias (at any time):**

- No cytopenias present  Neutropenia →  ANC <0.5 x10<sup>9</sup>/L  ANC <1.0 x10<sup>9</sup>/L  
 Absolute lymphocyte count <0.1 x10<sup>9</sup>/L  Thrombocytopenia →  < 20x10<sup>9</sup>/L  < 100x10<sup>9</sup>/L  
 Platelet count < 20x10<sup>9</sup>/L

Hemoglobin < 9 g/dL (<90 g/L) → **Was there laboratory evidence of hemolysis present?**

- |                                                                                        |                                                         |
|----------------------------------------------------------------------------------------|---------------------------------------------------------|
| <input type="radio"/> No evidence of hemolysis                                         | <input type="radio"/> Reticulocytosis                   |
| <input type="radio"/> Elevated LDH                                                     | <input type="radio"/> Elevated bilirubin (unconjugated) |
| <input type="radio"/> Warm autoantibody                                                | <input type="radio"/> Cold autoantibody                 |
| <input type="radio"/> Free hemoglobin (plasma)                                         | <input type="radio"/> Low haptoglobin                   |
| <input type="radio"/> Heme-hemopexin                                                   | <input type="radio"/> Methemalbumin                     |
| <input type="radio"/> Alloantibody                                                     | <input type="radio"/> Other                             |
| <input type="radio"/> Red blood cell fragments (schistocytes) on peripheral blood film |                                                         |

**Cytokine Levels**

Not measured  Yes → **If Yes, indicate all cytokines measured from the list below:**

**IL-1B:**  Not measured  Normal  Elevated → **Level:** \_\_\_\_\_ pg/mL Lower limit of reference range: \_\_\_ pg/mL

**IL-6:**  Not measured  Normal  Elevated → **Level:** \_\_\_\_\_ pg/mL Lower limit of reference range: \_\_\_ pg/mL

**TNFa:**  Not measured  Normal  Elevated → **Level:** \_\_\_\_\_ pg/mL Lower limit of reference range: \_\_\_ pg/mL

**IFNg:**  Not measured  Normal  Elevated → **Level:** \_\_\_\_\_ pg/mL Lower limit of reference range: \_\_\_ pg/mL

**IL-1:**  Not measured  Normal  Elevated → **Level:** \_\_\_\_\_ pg/mL Lower limit of reference range: \_\_\_ pg/mL
